# Supplementary material for: The Adaptive Nature of the Bone-Periodontal Ligament-Cementum Complex in a Ligature-Induced Periodontitis Rat Model
Source: Hindawi journal article supplement (doi:10.1155/2013/876316), 2013-01-01
Supplement: f9 [file 876316.f9.pdf]

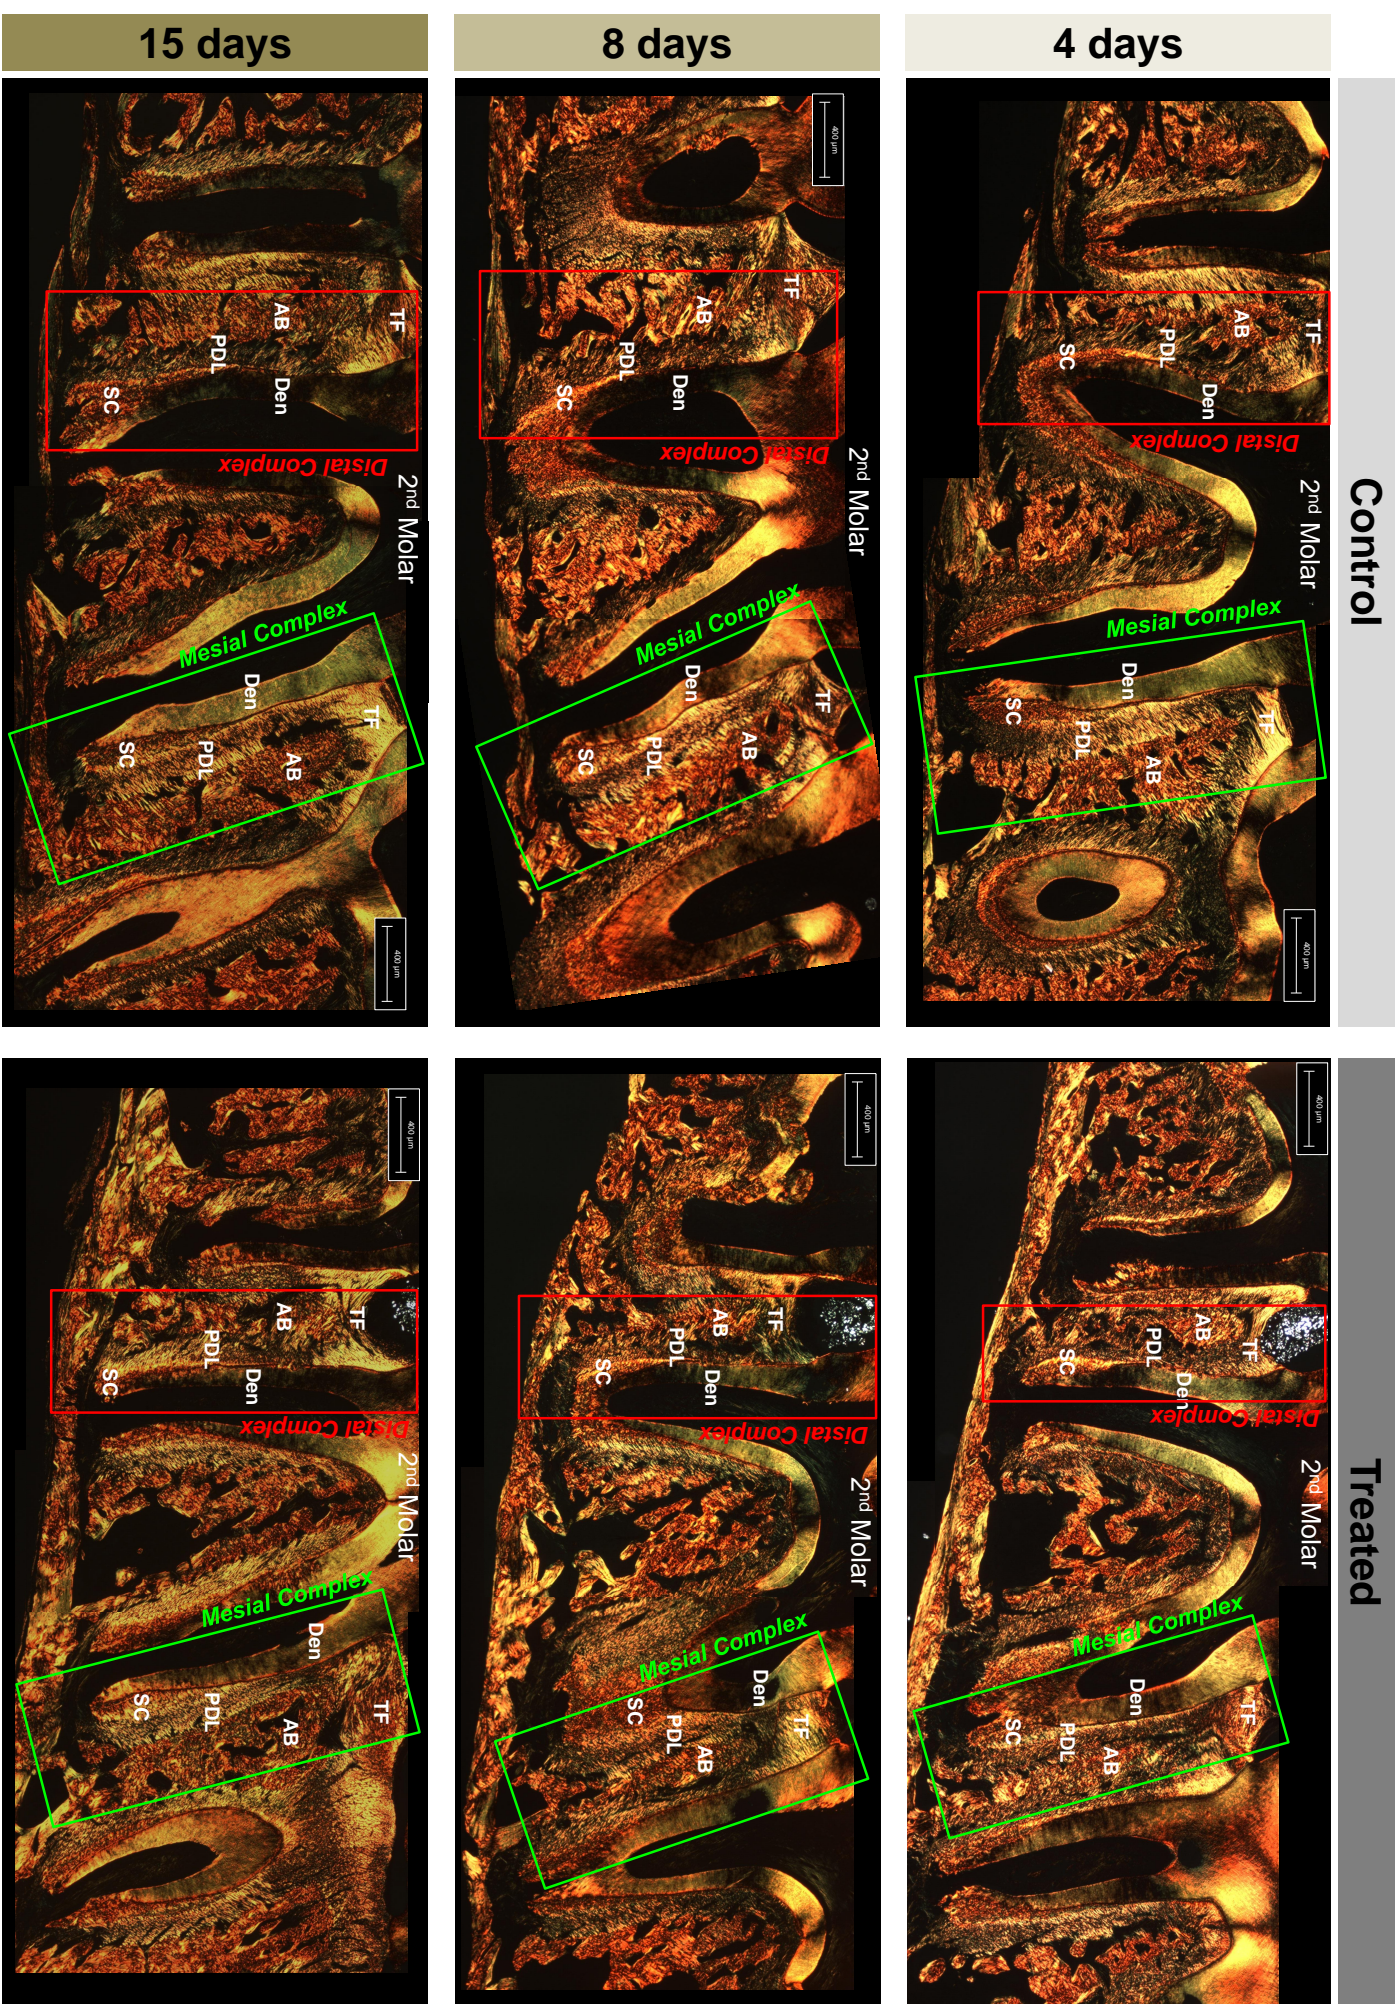



**Supplemental Figure 2**

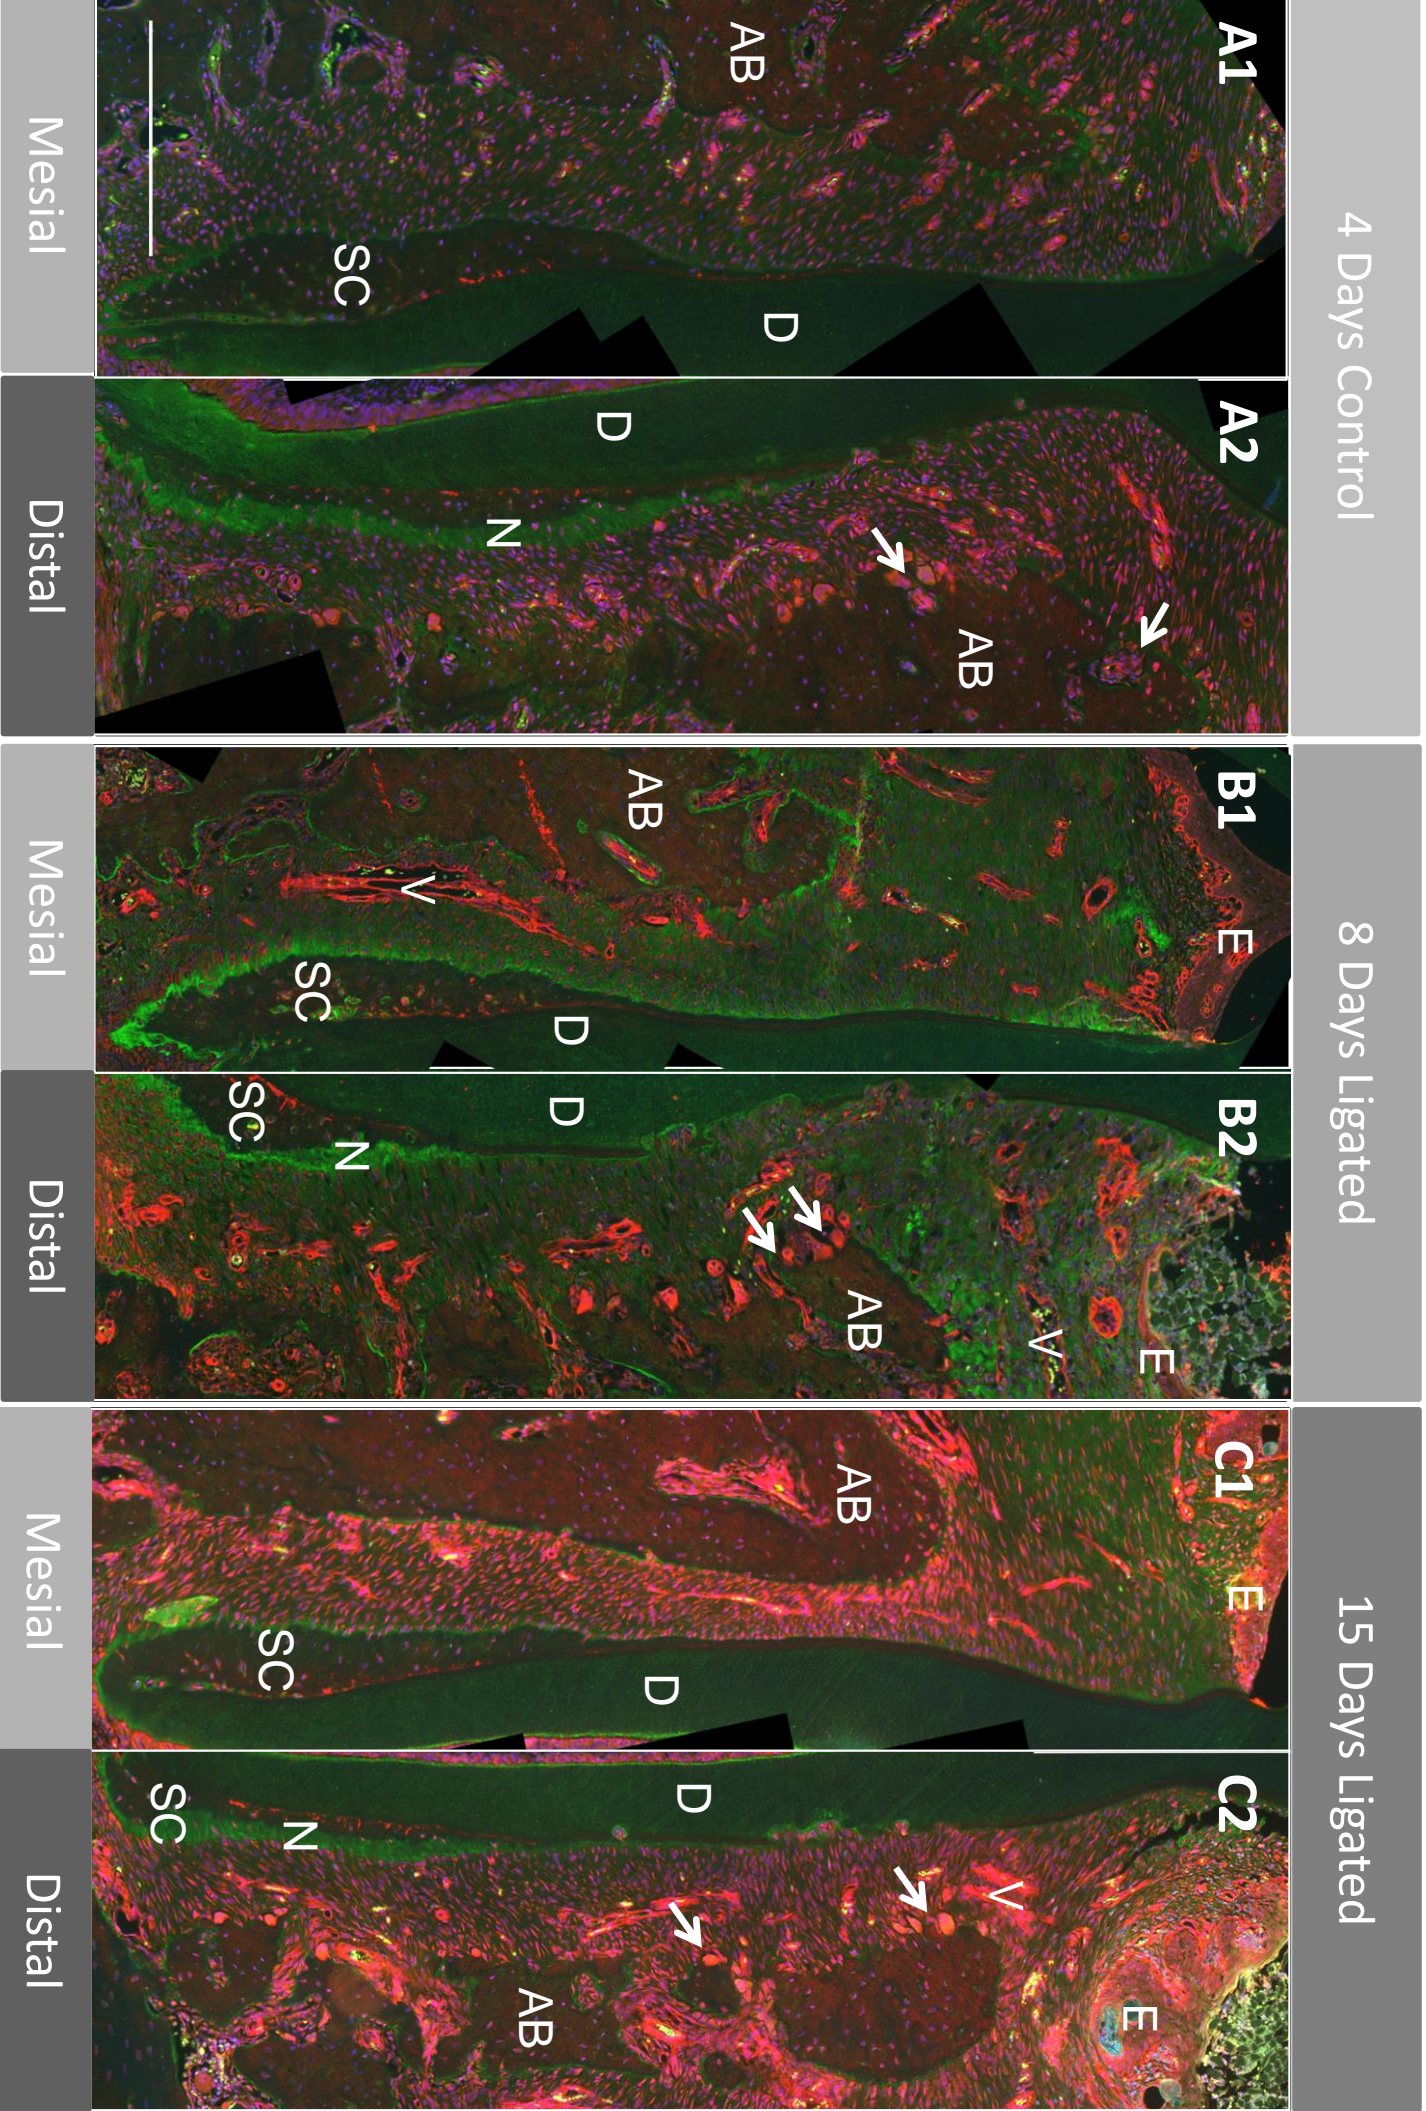



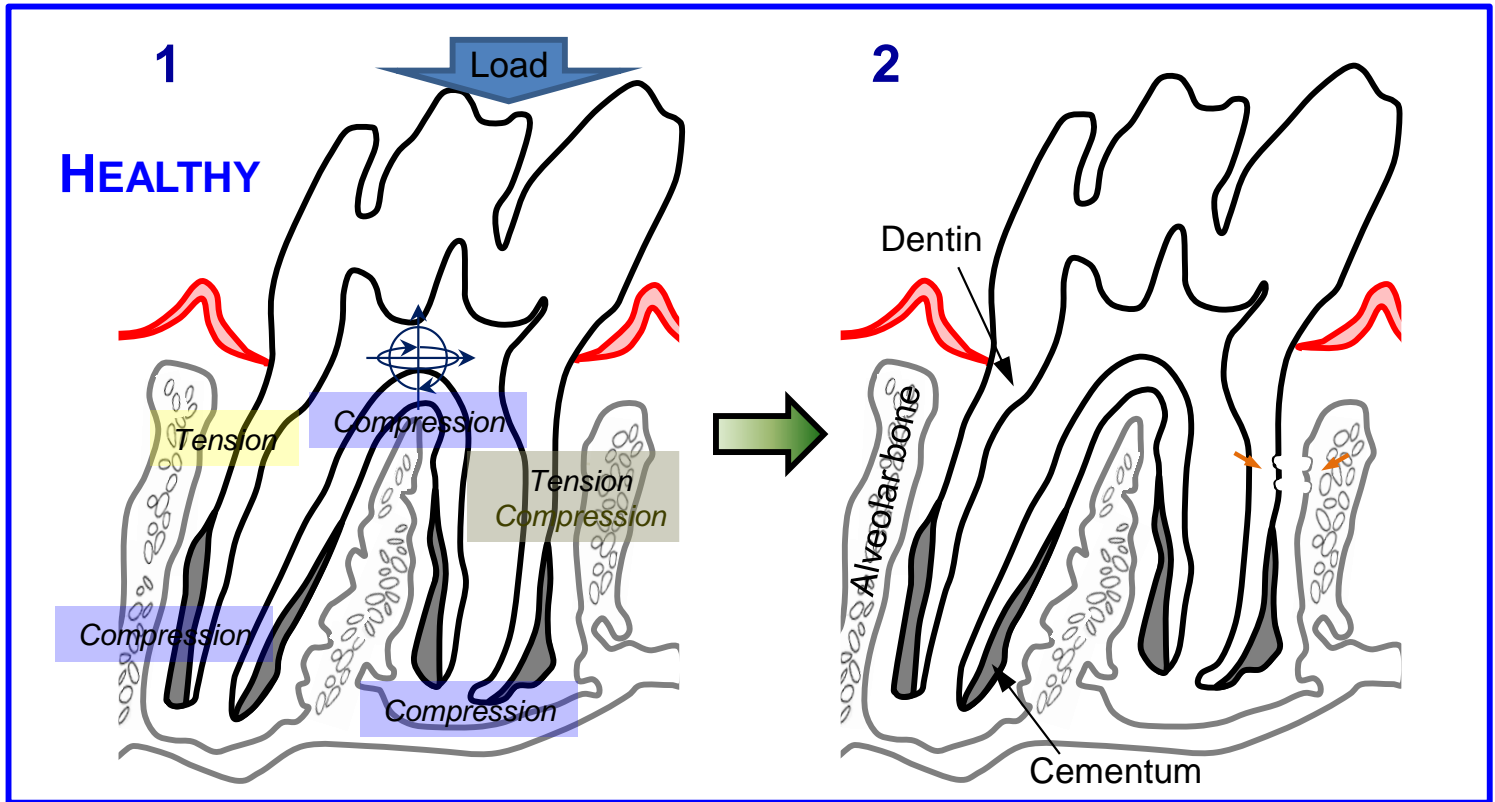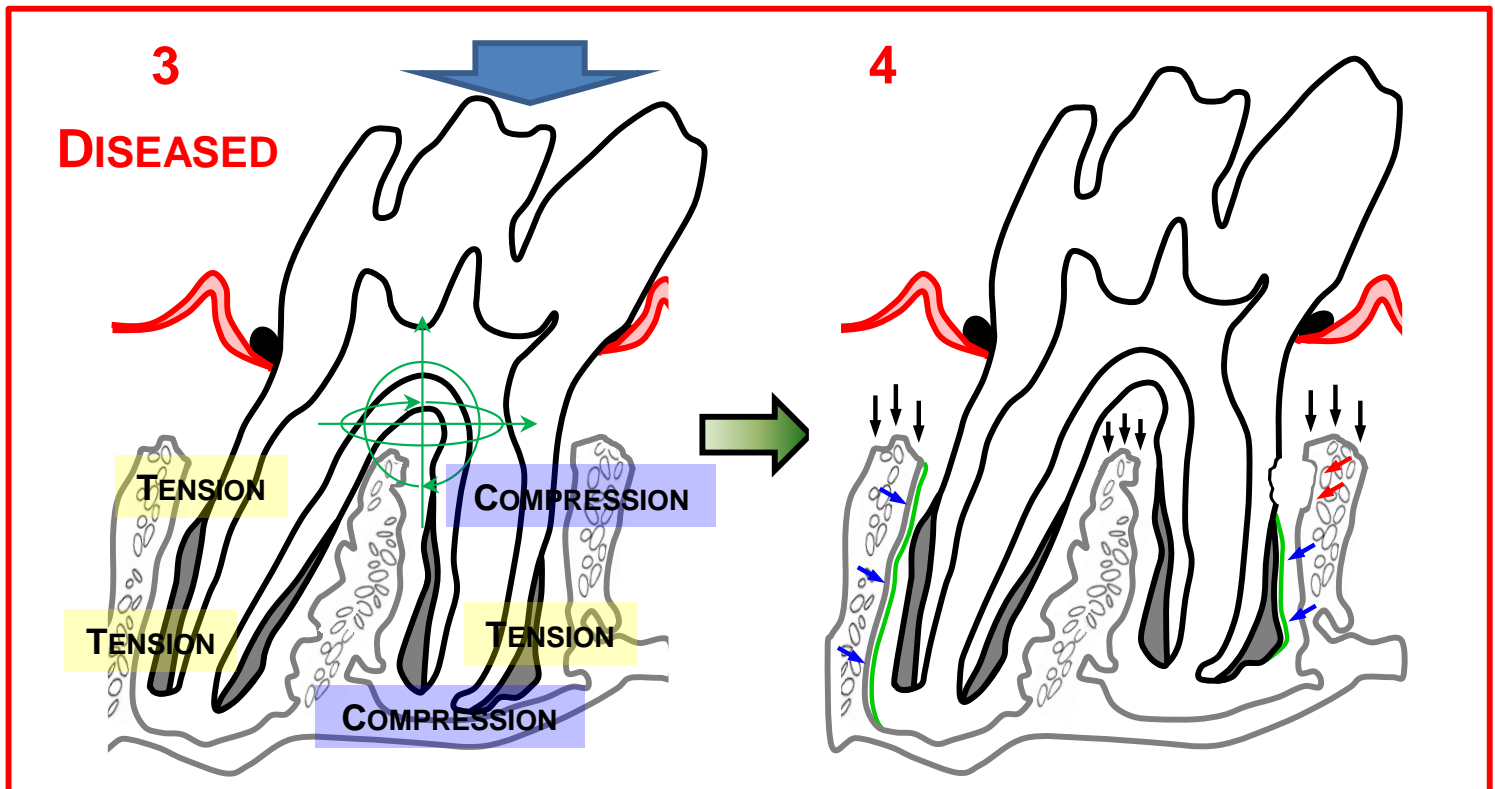

Supplemental Figure 3A

PDL-space

RANKL

TNF- $\alpha$

FN

TRAP

PSR

## Mesial

MESIAL complex predominantly maintained by physiological remodeling

Net decrease in PDL-space

BONE & PDL-BONE attachment site:

RANKL (-)

TNF (-)

FN (+)

TRAP (-)

PSR (+)

CEMENTUM & PDL-CEMENTUM

attachment site:

RANKL (-)

TNF (-)

FN (+)

TRAP (-)

PSR (+)

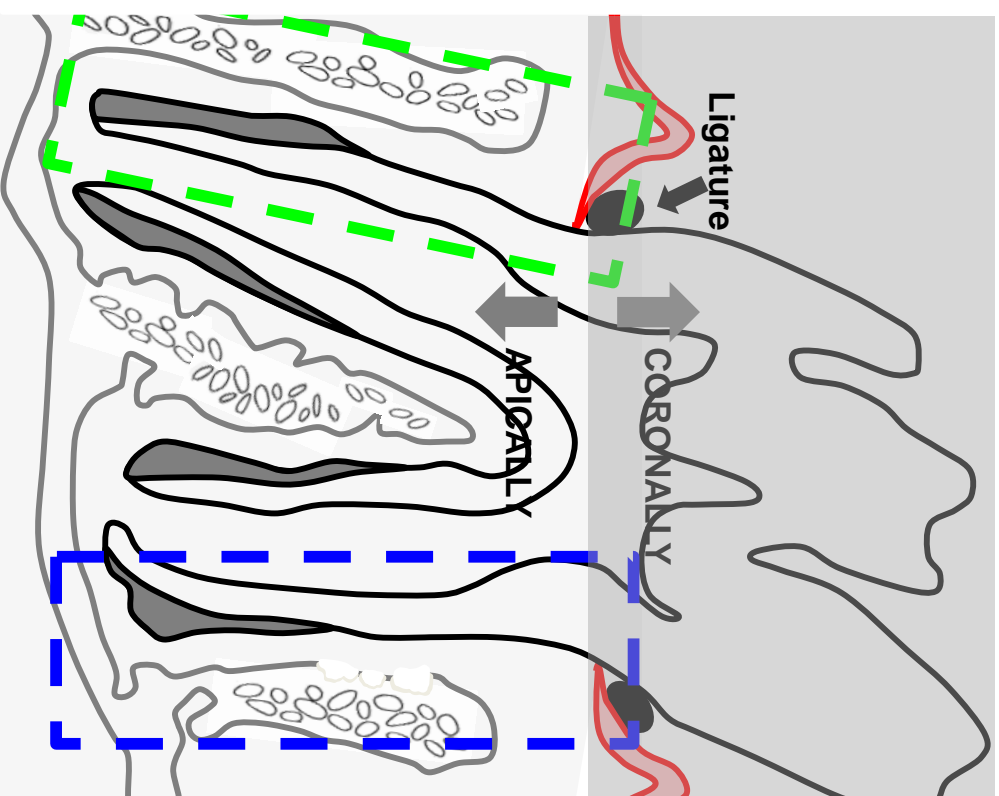

## Distal

DISTAL complex predominantly experiences increased resorption with time

Net increase in PDL-space

BONE & PDL-BONE attachment site:

RANKL (++)

TNF (++)

FN (-)

TRAP (++)

PSR (+)

CEMENTUM & PDL-CEMENTUM

attachment sites/interfaces:

RANKL (-)

TNF (-)

FN (++)

TRAP (-)

PSR (++)

(+) increased expression (-) no noticeable change
